# Supplementary material for: Deep and Quantitative Proteomic Profiling of Low Volume Mouse Serum Across the Lifespan
Source: Research Square preprint supplement (doi:10.21203/rs.3.rs-7179817/v1), 2025-07-31
Supplement: Supplementary file [file f06846db65f2a2de919d7cf6.pdf]

## Supplementary Figure 1: Feasibility Study

### A) Protein groups and peptides identified across different sample volumes

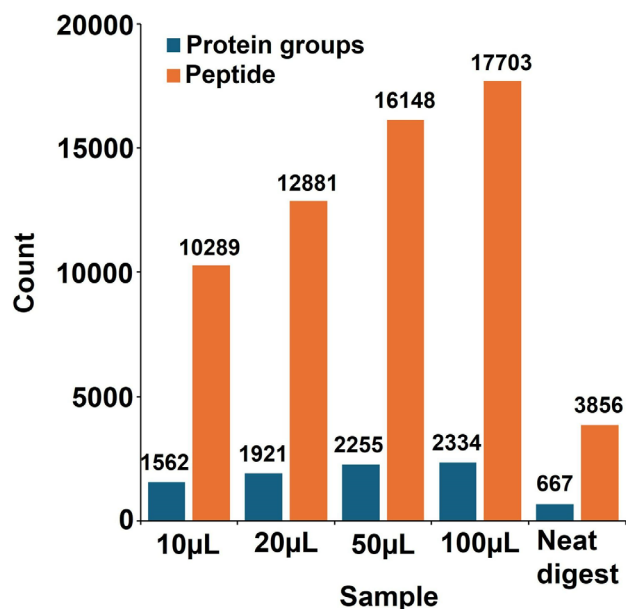

### B) Protein groups identified using two serum preparation methods

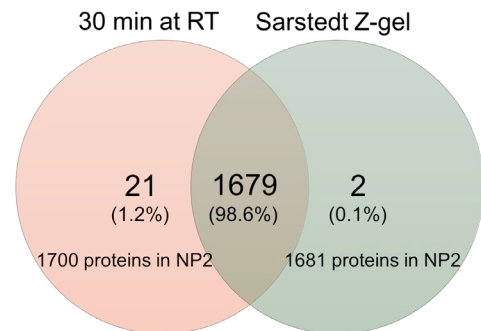

### C) Candidate SASP proteins identified from 20 µL of serum

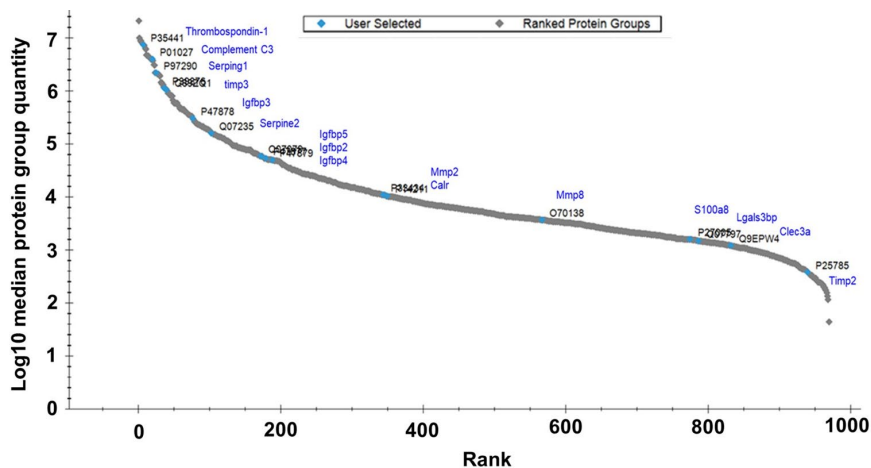

**Figure S1: A)** Number of protein and peptide groups identified in the feasibility study. **B)** Venn-diagram showing overlap of protein groups identified using two different serum preparation methods. **C)** Protein abundance ranked plot showing the dynamic range of protein detection

## Supplementary Figure 2 : Comparison of Nanoparticle Rollup and Quantification

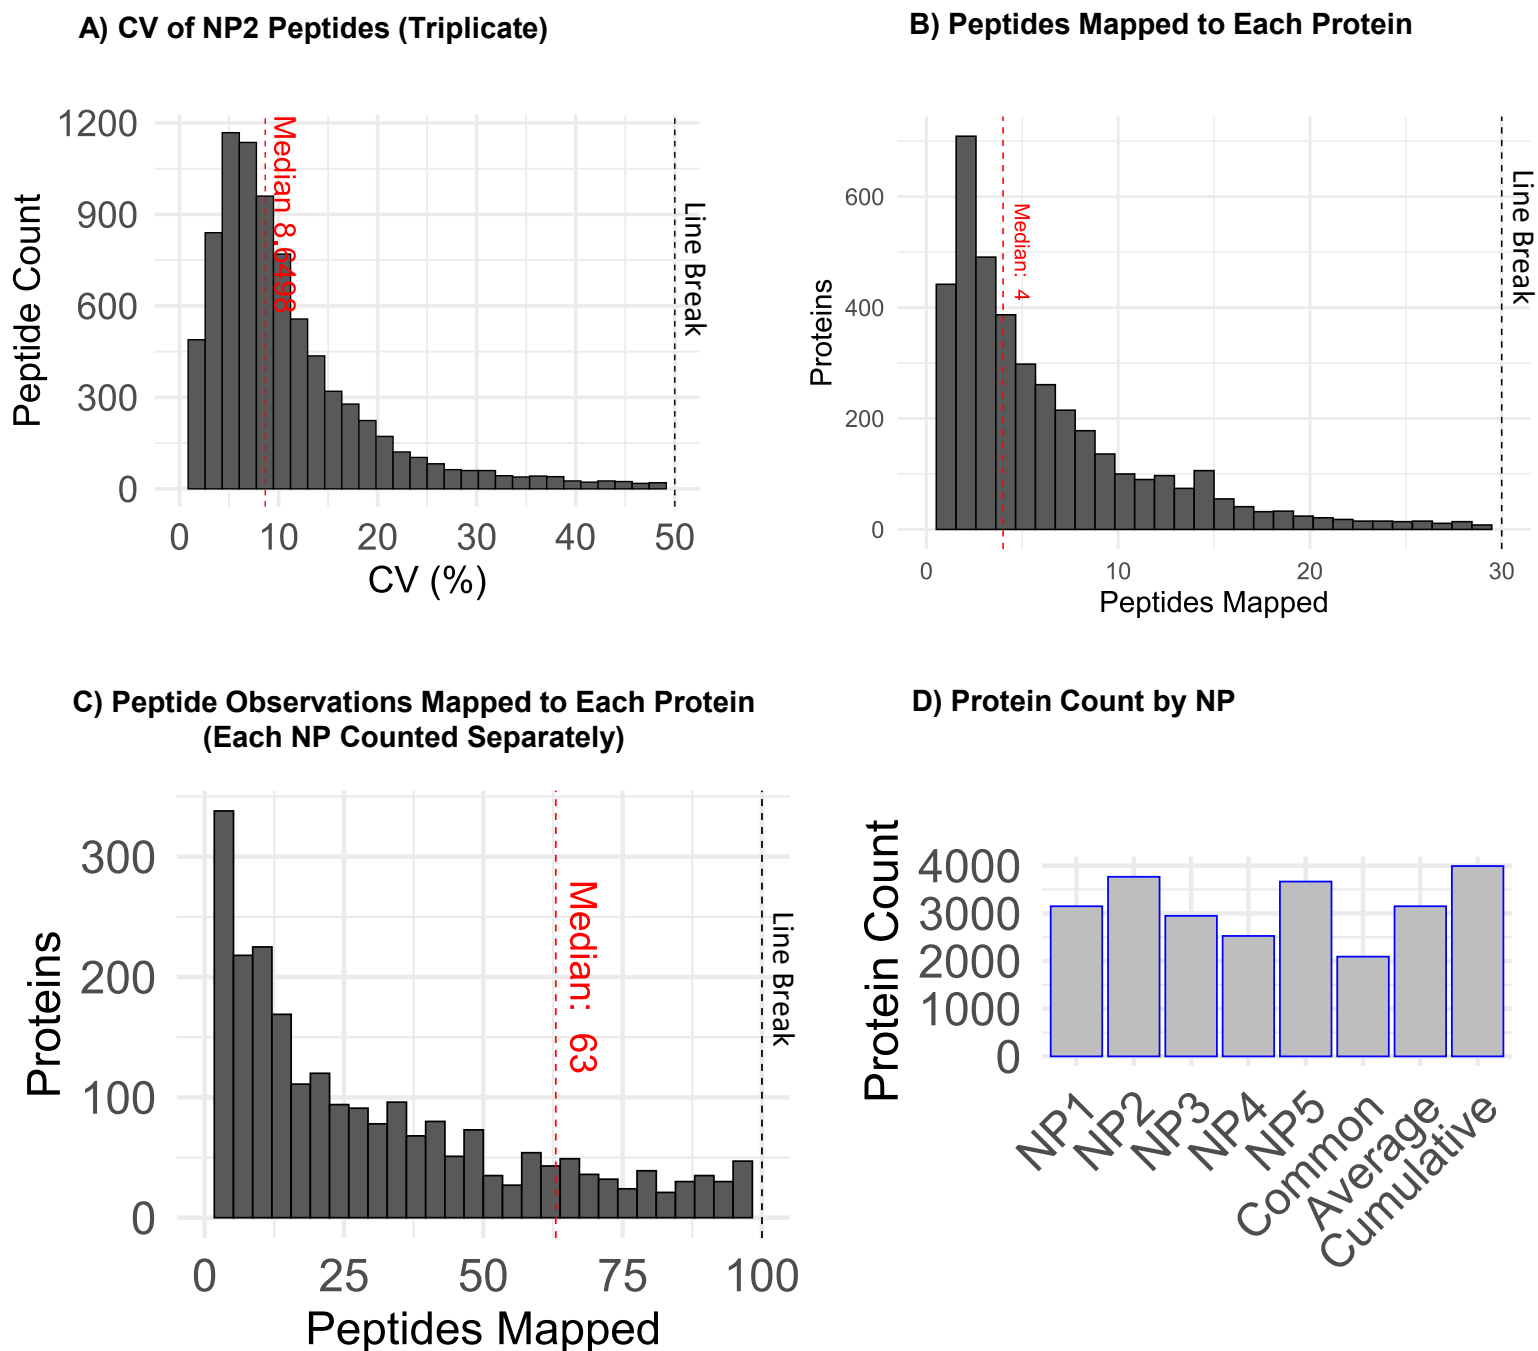

**Figure S2: A)** Coefficient of variation ( $CV = SD / \text{Mean abundances} \times 100$ ) of peptide level counts for NP2 across three technical replicates. Only peptides detected in all three samples were included. For clarity, a line break at 50% is used. **B)** The number of peptides mapped to each protein in the pilot study. For clarity, a line break at 30 is used. **C)** The number of unique peptide observations mapped to each protein in the pilot study; with each NP counted separately. For clarity, a line break at 100 is used. **D)** The number of proteins identified by each NP in the pilot study.

### Supplementary Figure 3: Sexual dimorphism

#### A) Age-sex Interaction associated proteins

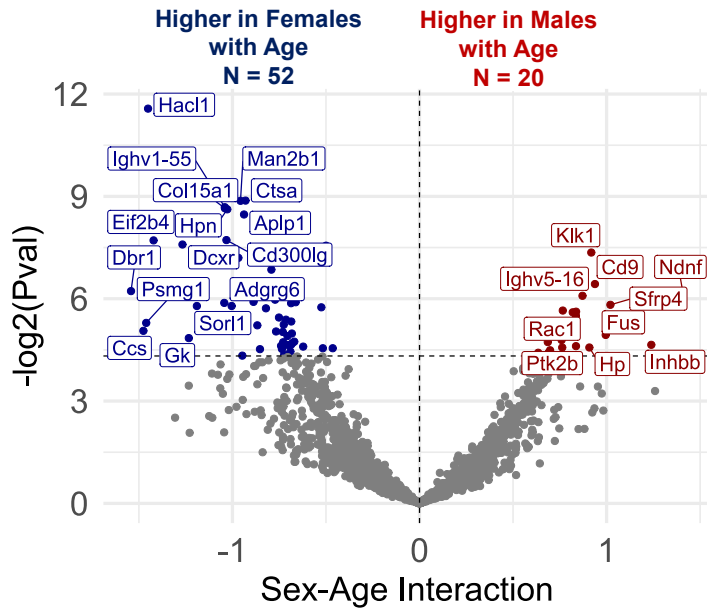

#### B) Col15a1 expression by age and sex

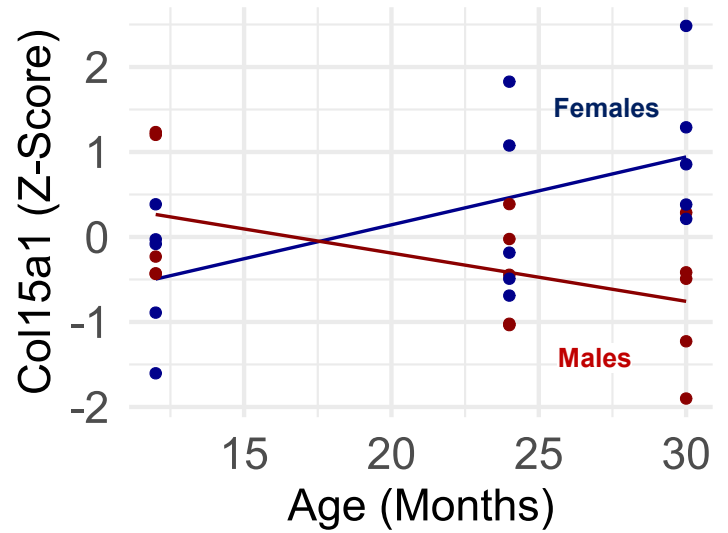

#### C) Serpina1e expression by age and sex

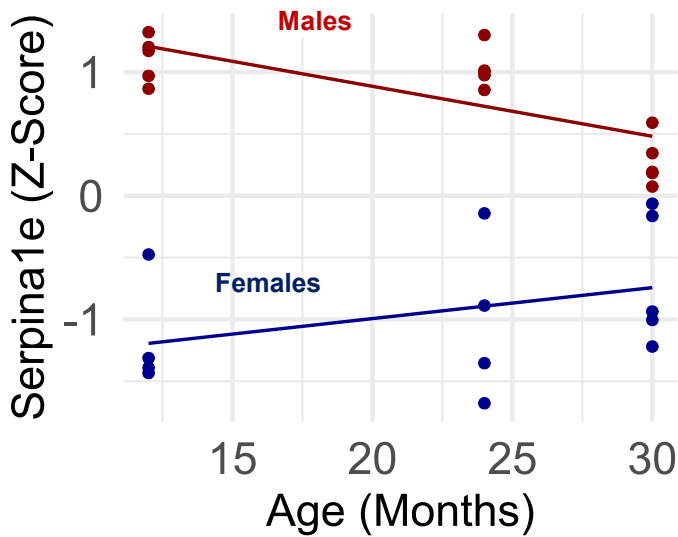

**Figure S3: A)** Pearson linear modeling to identify the interaction effects between sex and age on proteins measured by the NP-MS workflow, using the model: protein ~ sex \* age. **B)** Col15a1 abundance by age and sex. **C)** Serpina1e abundance by age and sex.

#### Supplementary Figure 4: Association of clinically relevant phenotypes

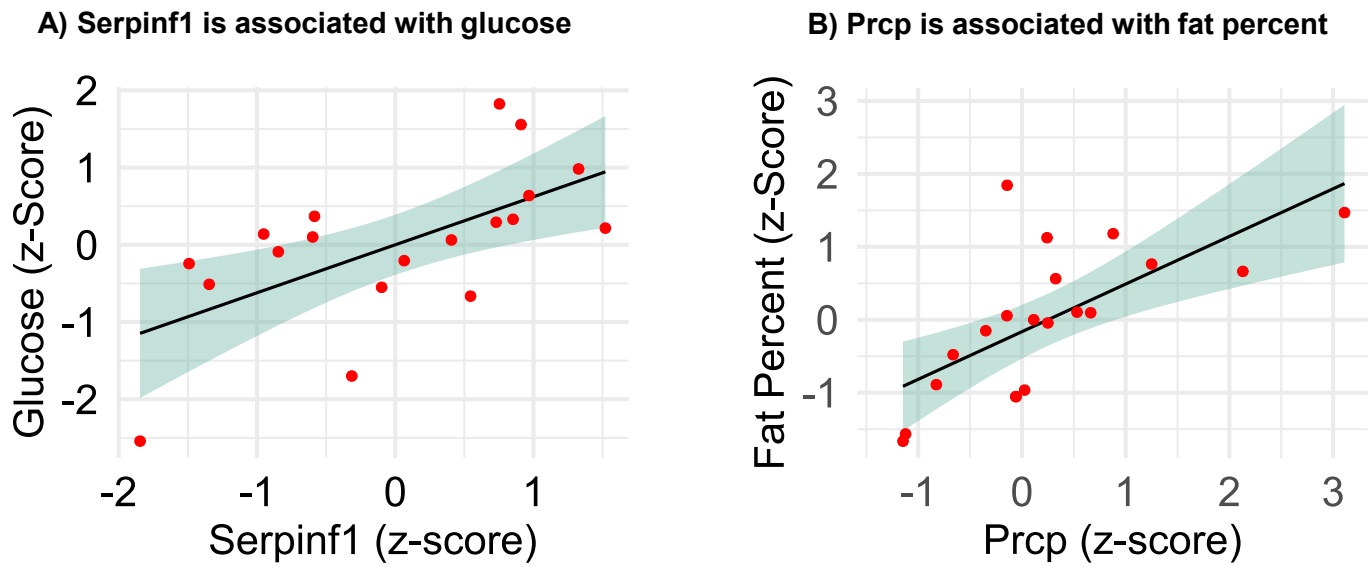

**Figure S4: A)** Serpinf1 abundance by glucose level in the pilot study cohort. **B)** Prcp abundance by fat percent in the pilot study cohort.
